# Supplementary material for: A Literature Review of Wetland Treatment Systems Used to Treat Runoff Mixtures Containing Antibiotics and Pesticides from Urban and Agricultural Landscapes
Source: MDPI journal article supplement (doi:10.3390/w13243631), 2021-12-17
Supplement: s1 [file s1]

# A literature review of wetland treatment systems used to treat runoff mixtures containing antibiotics and pesticides from urban and agricultural landscapes

## Supplementary Material

Emily R. Nottingham and Tiffany L. Messer

Table S1. Contaminant type and appearances in the primary studies.

| Contaminant by Type                 | Count of Appearance in Primary Studies |
|-------------------------------------|----------------------------------------|
| <b><u>Nutrients and Carbon</u></b>  |                                        |
| Total Nitrogen                      | 29                                     |
| Nitrate                             | 15                                     |
| Ammonia                             | 12                                     |
| Total Phosphorous                   | 10                                     |
| Nitrite                             | 4                                      |
| Other (n=4)                         | 8                                      |
| <b><u>Pesticide</u></b>             |                                        |
| Atrazine                            | 25                                     |
| Chlorpyrifos                        | 22                                     |
| S-Metolachlor                       | 21                                     |
| Alachlor                            | 16                                     |
| Isoproturon                         | 14                                     |
| Other (n=158)                       | 460                                    |
| <b><u>Antibiotics</u></b>           |                                        |
| Tetracycline                        | 11                                     |
| Sulfamethoxazole                    | 5                                      |
| Monensin                            | 3                                      |
| Narasin                             | 3                                      |
| Ciprofloxacin                       | 3                                      |
| Other (n=24)                        | 35                                     |
| <b><u>Other pharmaceuticals</u></b> |                                        |
| Carbamazepine                       | 3                                      |
| Caffeine                            | 2                                      |
| Diclofenac                          | 2                                      |
| Fluoxetine                          | 2                                      |

|              |    |
|--------------|----|
| Naproxen     | 2  |
| Other (n=10) | 10 |

**Metals**

|              |    |
|--------------|----|
| Copper       | 7  |
| Tin          | 4  |
| Iron         | 3  |
| Lead         | 3  |
| Manganese    | 3  |
| Other (n=17) | 23 |

**Minerals**

|            |   |
|------------|---|
| Selenium   | 2 |
| Molybdenum | 1 |
| Sodium     | 1 |
| Vanadium   | 1 |

**Industrial Byproducts**

|                           |   |
|---------------------------|---|
| Bisphenol A               | 2 |
| Uranine                   | 2 |
| 5-methyl-1H-benzotriazole | 2 |
| Benzotriazole             | 2 |
| Di-n-butyl phthalate      | 1 |
| Other (n=8)               | 7 |

---

**Table S2.** Contaminant removal rates for the primary studies that analyzed both nitrogen and pesticide and/or antibiotics in wetland treatment systems.

| Removal Rates (%) |       |                    |                                 |           |            | CEC Studied                                                                                                                                       | Scale      | Wetland Type   | Plant Type                                                                                                                                                                                                                                                                                                                                                                                                                                                               | Source |
|-------------------|-------|--------------------|---------------------------------|-----------|------------|---------------------------------------------------------------------------------------------------------------------------------------------------|------------|----------------|--------------------------------------------------------------------------------------------------------------------------------------------------------------------------------------------------------------------------------------------------------------------------------------------------------------------------------------------------------------------------------------------------------------------------------------------------------------------------|--------|
| TN                | TP    | NO <sub>3</sub> -N | NH <sub>4</sub> <sup>+</sup> -N | Pesticide | Antibiotic |                                                                                                                                                   |            |                |                                                                                                                                                                                                                                                                                                                                                                                                                                                                          |        |
| 85                | N/A   | N/A                | N/A                             | 87.50     | N/A        | Atrazine                                                                                                                                          | Full-scale | Wetland Buffer | Typha latifolia                                                                                                                                                                                                                                                                                                                                                                                                                                                          | [46]   |
| >20               | 40-83 | 0                  | 15-40                           | N/R       | N/A        | N/R                                                                                                                                               | Full-scale | HF             | Juncus, Typha minima, Equisetum, Pontederia cordata, Iris sp., Canna sp.                                                                                                                                                                                                                                                                                                                                                                                                 | [3]    |
| N/A               | N/A   | 70                 | N/A                             | 54        | N/A        | Azinphos-methyl                                                                                                                                   | Full-scale | HF             | Not reported                                                                                                                                                                                                                                                                                                                                                                                                                                                             | [142]  |
| N/A               | 54-75 | 70-84              | N/A                             | 77-93     | N/A        | Organophosphorus insecticides                                                                                                                     | Full-scale | Pond           | Typha capensis, Juncus kraussi, Cyperus dives                                                                                                                                                                                                                                                                                                                                                                                                                            | [106]  |
| 15-80             | 23-26 | N/A                | N/A                             | 0-67      | N/A        | Fluroxypyr, Metribuzin, Metamitron, Propachlor, Bentazone, Dicamba, Mecoprop, Propiconazole, MCPA, Dichlorprop, Linuron, Fenpropimorph, Metalaxyl | Full-scale | HF             | Sporangium erectum, Phragmites, Phalaris arundinacea, Urtica dioica, Myosotis scorpiodes                                                                                                                                                                                                                                                                                                                                                                                 | [205]  |
| 16                | 12    | 22                 | N/A                             | BD        | N/A        | Organochlorine pesticides, Polycyclic aromatic hydrocarbons, Trace metals                                                                         | Full-scale | HF             | Turff grass, Littoral vegetation, Emergent vegetation                                                                                                                                                                                                                                                                                                                                                                                                                    | [213]  |
| N/A               | 74    | 97                 | 100                             | BD        | N/A        | Monensin, Salinomycin, Narasin                                                                                                                    | Full-scale | HF             | Sagittaria L., Carex lacustris, Sparganium americanum, Eleocharis fallax Weatherby, Carex cristatella, Iris versicolor L. harlequin blueflag, Carex lacustris Willd, Carex lurida, Pontederia cordata L., Spartina pectinata Bosc ex Link, Scirpus fluviatilis (Torrey) Gray, Juncus effusus L., Schoenoplectus tabernaemontani (K.C. Gmel.) Palla, Acorus gramineus Sol. ex Aiton grassleaf, Scirpus pungens Vahl, Nymphaea alba, Scirpus cyperinus, Muphar polysepalem | [99]   |

|       |        |       |         |          |        |                                                                                                                                                                                                   |            |                 |                                                                                        |       |
|-------|--------|-------|---------|----------|--------|---------------------------------------------------------------------------------------------------------------------------------------------------------------------------------------------------|------------|-----------------|----------------------------------------------------------------------------------------|-------|
| 65    | N/A    | 58-83 | N/A     | N/A      | N/R    | Monensin, Salinomycin, Narasin                                                                                                                                                                    | Microcosm  | FWS, SF         | None                                                                                   | [43]  |
| 89    | 85     | N/A   | N/A     | 100      | N/A    | Atrazine, S-metolachlor, Permethrin                                                                                                                                                               | Full-scale | Natural wetland | Leersia sp., Cyperus sp., Carex sp., Lemnaceae sp.                                     | [77]  |
| 43-98 | 96-98  | 0     | 92-100  | 80-100   | N/A    | Atrazine, S-metolachlor, Permethrin                                                                                                                                                               | Full-scale | Natural wetland | Leersia sp., Cyperus sp., Carex sp., Lemnaceae sp.                                     | [184] |
| 84-98 | 11-71  | N/A   | N/A     | 50-99    | N/A    | Atrazine, S-metolachlor, Permethrin                                                                                                                                                               | Mesocosm   | FWS             | Juncus effusus, Phragmites australis                                                   | [67]  |
| N/A   | N/A    | 5-11  | N/A     | -619-100 | N/A    | Propyzamide, Boscalid, Diflufenicanil, Isoproturon, Propoxycarbazone-Na, Mesosulfuron-methyl, Metasulfuron-methyl, Clopyralid, Cyproconazole, 2,4-MCPA, Propiconazole, Epoxiconazole, OH-Atrazine | Full-scale | Wetland buffer  | Juncus conglomeratus, Juncus inflexus, Ranonculus repens, Glyceria notata              | [126] |
| 35-98 | 35-98  | N/A   | 45-98   | 46-93    | N/A    | Tebuconazole, Imazalil                                                                                                                                                                            | Mesocosm   | HF              | Typha latifolia, Phragmites australis, Iris pseudacorus, Berula erecta, Juncus effusus | [201] |
| 5-99  | 5-99   | N/A   | 7-99    | 8-89     | N/A    | Tebuconazole                                                                                                                                                                                      | Mesocosm   | HF              | Juncus effusus, Typha latifolia, Berula erecta, Phragmites australis, Iris pseudacorus | [102] |
| 40-99 | 40-100 | 29-98 | 60-95   | 33-100   | N/A    | Tebuconazole                                                                                                                                                                                      | Mesocosm   | HF              | Typha latifolia, Phragmites australis, Iris pseudacorus, Juncus effusus, Berula erecta | [120] |
| N/A   | N/A    | N/A   | 61.7-73 | 88-95    | N/A    | Tetracycline                                                                                                                                                                                      | Mesocosm   | FWS             | Cyperus involucratus                                                                   | [48]  |
| N/A   | N/A    | 40-98 | 98-99   | N/A      | N/R    | Ofloxacin, Tetracycline                                                                                                                                                                           | Microcosm  | N/A             | Cyperus alternifolius, Typha angustifolia, Lythrum alicaria, Acorus calamus            | [131] |
| N/A   | N/A    | 28-39 | 72.6-90 | N/A      | N/R    | Ofloxacin                                                                                                                                                                                         | Microcosm  | N/A             | Cyperus alternifolius, Typha angustifolia                                              | [30]  |
| N/A   | N/R    | N/R   | N/R     | 88-99    | N/A    | Chlorpyrifos, 3,5,6-trichloro-2-pyridinol                                                                                                                                                         | Mesocosm   | SF              | Canna indica                                                                           | [171] |
| 71-90 | 15-50  | N/A   | 85-90   | N/A      | 79-100 | Tetracycline                                                                                                                                                                                      | Mesocosm   | HF              | Myriophyllum aquaticum                                                                 | [112] |

|       |       |         |       |        |       |                                                                                                                                                                                                                                        |            |                |                                                                                                                                                      |       |
|-------|-------|---------|-------|--------|-------|----------------------------------------------------------------------------------------------------------------------------------------------------------------------------------------------------------------------------------------|------------|----------------|------------------------------------------------------------------------------------------------------------------------------------------------------|-------|
| 26-81 | 15-90 | 20-95   | 31-35 | N/A    | 87-97 | Levofloxacin                                                                                                                                                                                                                           | Microcosm  | N/A            | Juncus, Drimia maritima stearn, Canna indica, Acorus calamus, Iris pseudacorus, Thalia dealbata fraser, Oenanthe javanica DC., Cyperus alternifolius | [97]  |
| 40    | 9     | 92      | 85    | 30-99  | 35-90 | MCPA, Terbutylazine, Tebuconazole, Propanil, Oxadiazine, Molinate, Chlorpyrifos, Bentazone, Atrazine, Alachlor, Triclosan, Primidone, Oxazepam, Naproxen, Lorazepam, Carbamazepine, Benzotriazole, 5TTri, Tributyl phosphate, Caffeine | Full-scale | HF, Rice field | Rice, Helophytic vegetation                                                                                                                          | [103] |
| 17-85 | 46-78 | 47-86   | N/A   | -48-99 | N/A   | Acephate, Bifenthrin, Carbaryl, Chlorothalonil, Chlorpyrifos, Dimethenamid, Fipronil, Indaziflam, Isoxaben, Myclobutanil, Oryzalin, Oxadiazon, Oxyfluorfen, Pendimethalin, Propiconazole                                               | Full-scale | SF, FWS        | Rice                                                                                                                                                 | [159] |
| N/A   | N/A   | 13-74   | 80-96 | N/A    | N/R   | Ofloxacin, Tetracycline                                                                                                                                                                                                                | Microcosm  | N/A            | Artificial root exodus                                                                                                                               | [22]  |
| 38-83 | 62-99 | N/A     | 26-96 | N/A    | N/R   | Levofloxacin                                                                                                                                                                                                                           | Mesocosm   | FTW            | Iris pseudoacorus                                                                                                                                    | [113] |
| 26-86 | N/A   | -113-37 | 93    | N/A    | 54    | Sulfamethoxazole                                                                                                                                                                                                                       | Mesocosm   | VF             | None                                                                                                                                                 | [114] |
| 33-56 | 62-77 | N/A     | N/A   | N/A    | 99.70 | Tetracycline                                                                                                                                                                                                                           | Mesocosm   | HF             | Vallisneria spiralis                                                                                                                                 | [169] |
| 71    | N/A   | 94      | 94    | N/A    | 69-93 | Ciprofloxacin, Sulfamethazine                                                                                                                                                                                                          | Mesocosm   | VF             | Phragmites communis                                                                                                                                  | [59]  |
| N/A   | 42-80 | N/A     | 11-65 | N/A    | 55-99 | Abamectin                                                                                                                                                                                                                              | Mesocosm   | VF             | Not reported                                                                                                                                         | [179] |
| 20-53 | 39-69 | N/A     | N/A   | N/A    | 100   | Ciprofloxacin                                                                                                                                                                                                                          | Mesocosm   | SF             | Vallisneria spiralis                                                                                                                                 | [58]  |
| N/A   | BD    | 0       | 100   | 100    | N/A   | Clopyralid                                                                                                                                                                                                                             | Full-scale | HF             | Typha spp.                                                                                                                                           | [218] |

\*N/A means that the contaminant was not present in the runoff mixture and/or was not a focus of the study. N/R means that the contaminant was part of the study but the removal rates of said contaminant were not reported or analyzed. BD means that the contaminant was thought to be in the runoff mixture but upon analysis was not able to be detected.

Horizontal flow constructed wetland (HF); Subsurface flow constructed wetland (SF); Vertical flow constructed wetland (VF); Free-water surface constructed wetland (FWS), Floating treatment wetland (FTW).
